# Supplementary material
Source: publisher figshare collection journal article supplement (https://acs.figshare.com/ndownloader/files/10498756)
Supplement: Supplementary file 1 [file 10498756]

## Supporting Information

### **Photo-Rechargeable Organo-Halide Perovskite Batteries**

Shahab Ahmad<sup>1\*</sup>, Chandramohan George<sup>1</sup>, David J. Beesley<sup>1</sup>, Jeremy J. Baumberg<sup>2</sup> and Michael De Volder<sup>1\*</sup>

<sup>1</sup>*Institute for Manufacturing, Department of Engineering, University of Cambridge, Cambridge, CB3 0FS, United Kingdom.*

<sup>2</sup>*Nanophotonics Centre, Cavendish Laboratory, University of Cambridge, Cambridge, CB3 0HE, United Kingdom.*

Correspondence to: Shahab Ahmad: sa754@cam.ac.uk, Michael De Volder: mfld2@cam.ac.uk

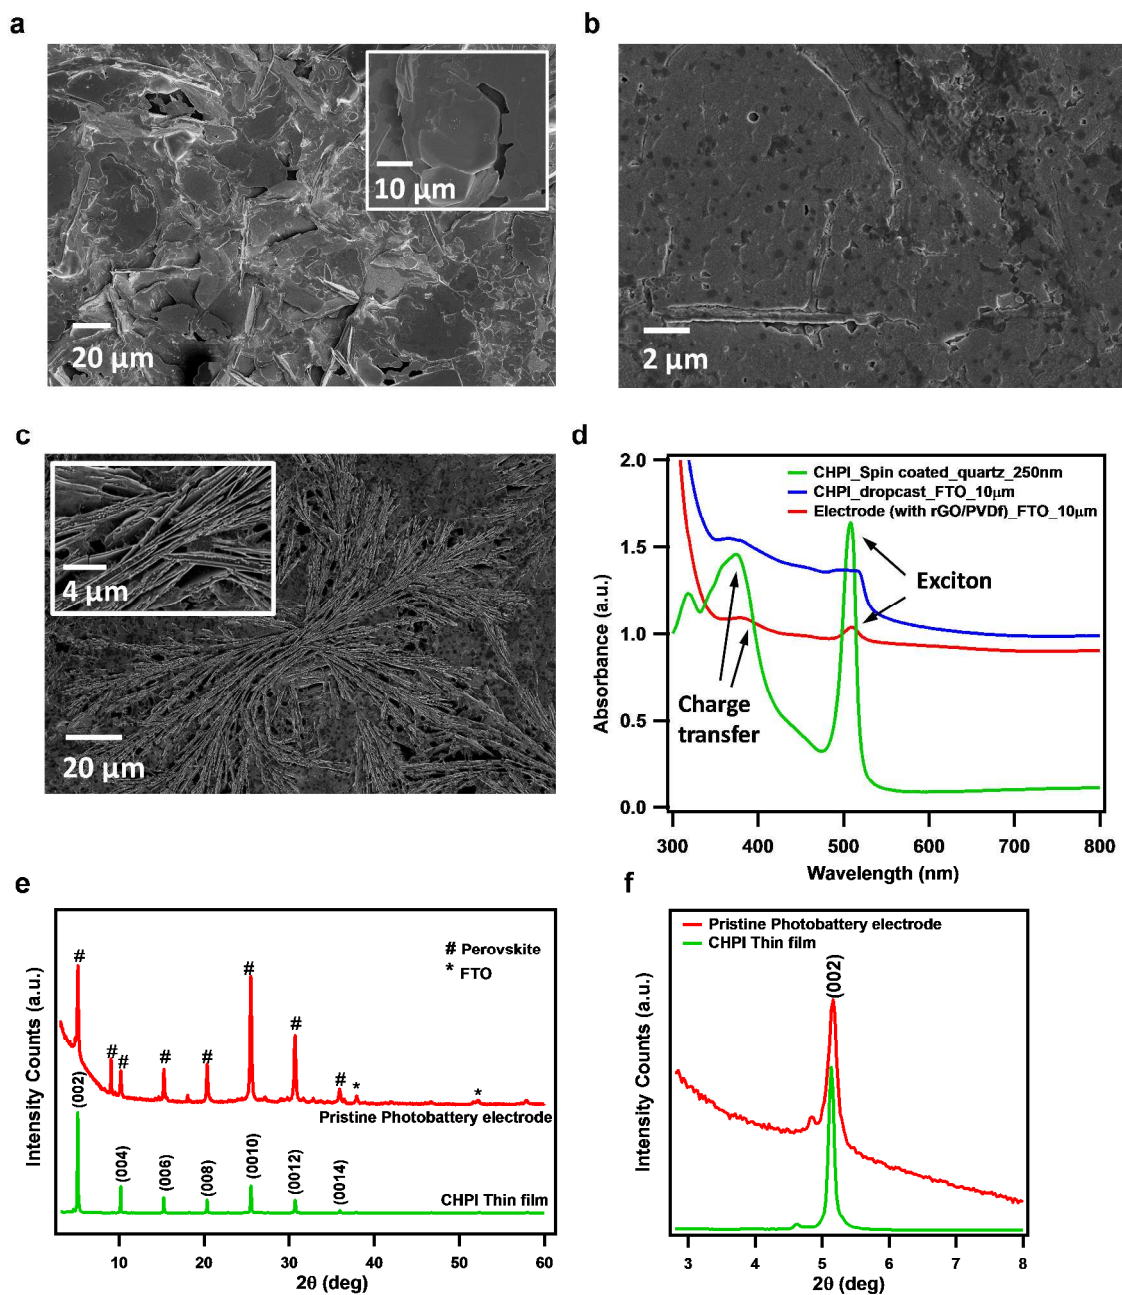

**Figure S1:** SEM images of ordinary (a) Drop casted and (b) Hot-casted films of pristine CHPI solution prepared on FTO substrates. The hot-casting process is adopted from a recently published paper<sup>1</sup>. Inset in (a) shows the hexagonal shaped bulk perovskite crystals<sup>2,3</sup>. (c) SEM image (top view) shows the vertical assembly of crystalline platelets of 2D perovskite on an FTO substrate. (d) Optical absorption spectra of perovskite photobattery electrode (B2) prepared on pre-cleaned FTO substrates (red line). The absorbance of drop-casted and spin-coated films of pristine CHPI is added for comparison. (e) X-Ray Diffraction measurements of a pristine perovskite photo-battery electrode (B2) and pristine perovskite thin film (CHPI). (f) Close-up view of characteristic (002) peak for the

photo-battery electrode, which does not show any significant shift in the diffraction angle position when compared with the pristine perovskite thin film (CHPI).

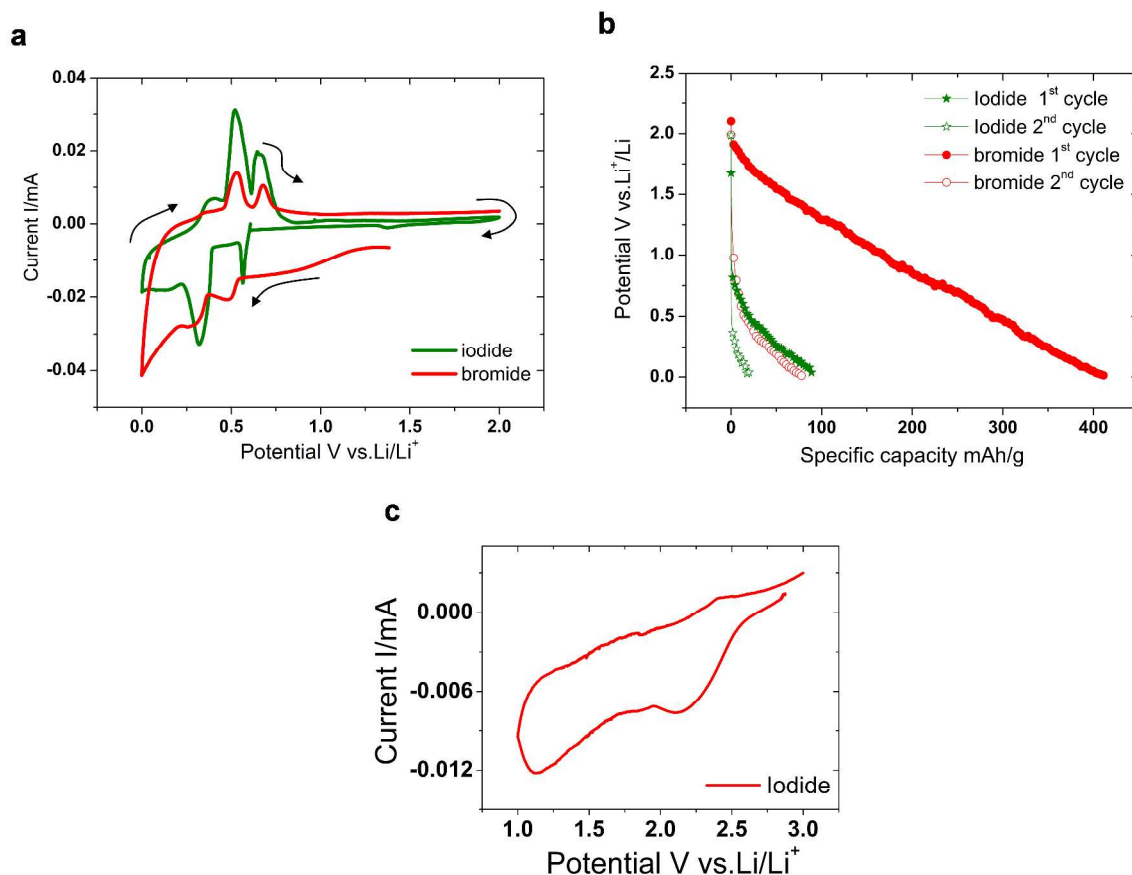

**Figure S2:** (a) Cyclic-voltammetry measurement of CHPI and CHPB 2D perovskites at 0.05 mV/s, measured in standard coin cell configuration under dark conditions. (b) First and second charge-discharge voltage profile of CHPI and CHPB 2D perovskites at ~30 mA/g and ~40 mA/g respectively from corresponding standard coin cells, the measurements were done in dark conditions. (c) Cyclic-voltammetry of CHPI photo-battery at 0.1 mV/s, measured in dark conditions.

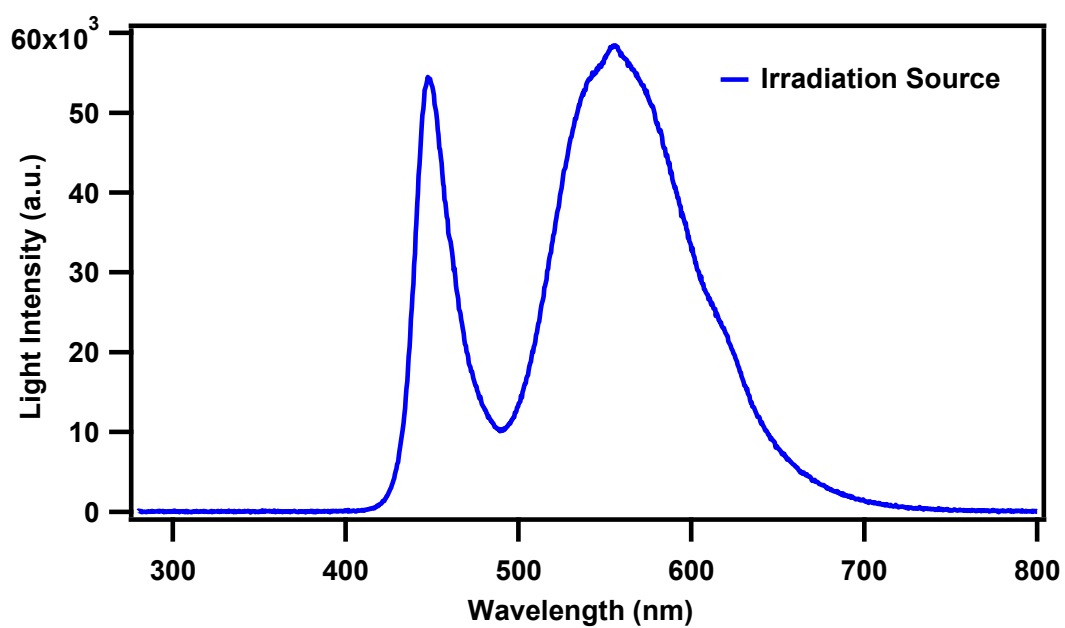

**Figure S3:** Spectrum of the LED irradiation source used for photo-charging.

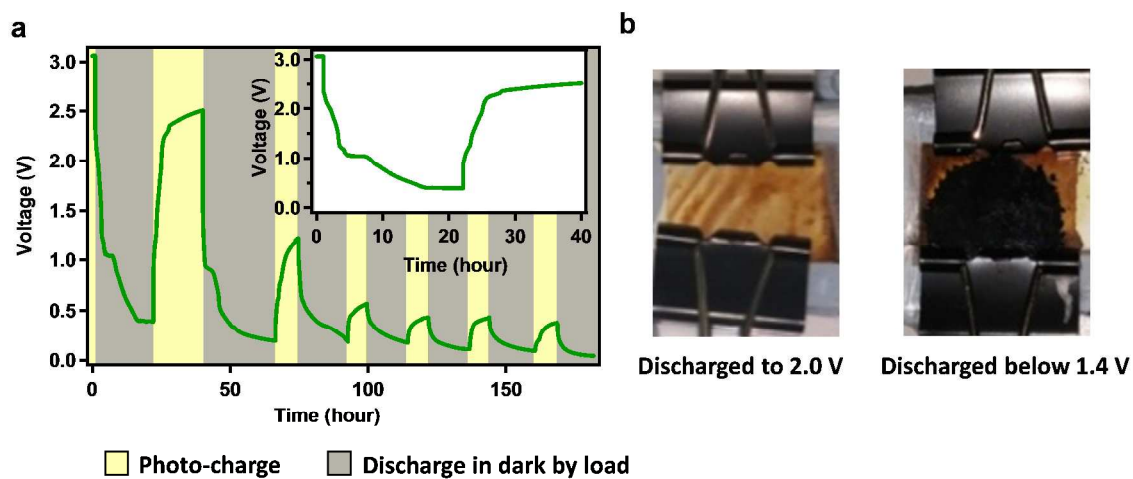

Figure S4: (a) Photocharge-discharge voltage profiles of a perovskite photobattery electrode with PCBM (*BI*) as additive. (b) Close-up photographs of electrodes when discharged to 2.0V and below 1.4V.

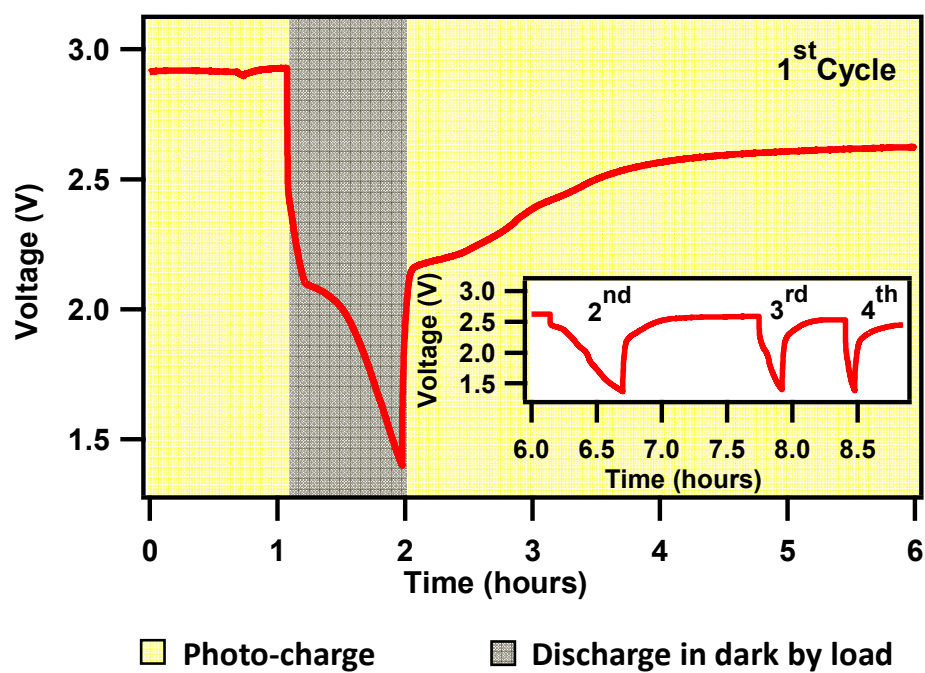

**Figure S5:** Photocharge-discharge voltage profiles of a perovskite photobattery electrode (B2) fabricated on a graphene based transparent electrode instead of FTO. The device shows a similar performance as ones with FTO as transparent substrate.

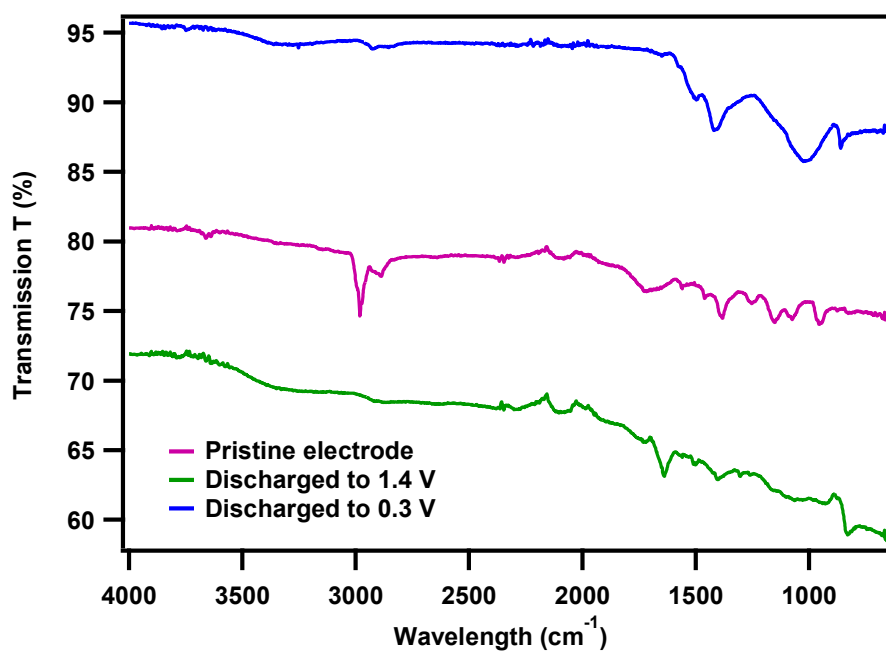

**Figure S6:** Fourier transform infrared (FTIR) spectroscopy using attenuated total reflection (ATR-FTIR) of a photo-battery electrodes discharged to 1.4 V and 0.3 V. FTIR spectra of pristine electrode is added for comparison. The electrode material is collected from the cell and analysed by ATR-FTIR. Occurrence of relatively strong peaks at 1016  $\text{cm}^{-1}$  and 1423  $\text{cm}^{-1}$  in case of photo-battery discharged to 0.3 V could be due to the electrochemical reduction of electrolyte<sup>4</sup>.

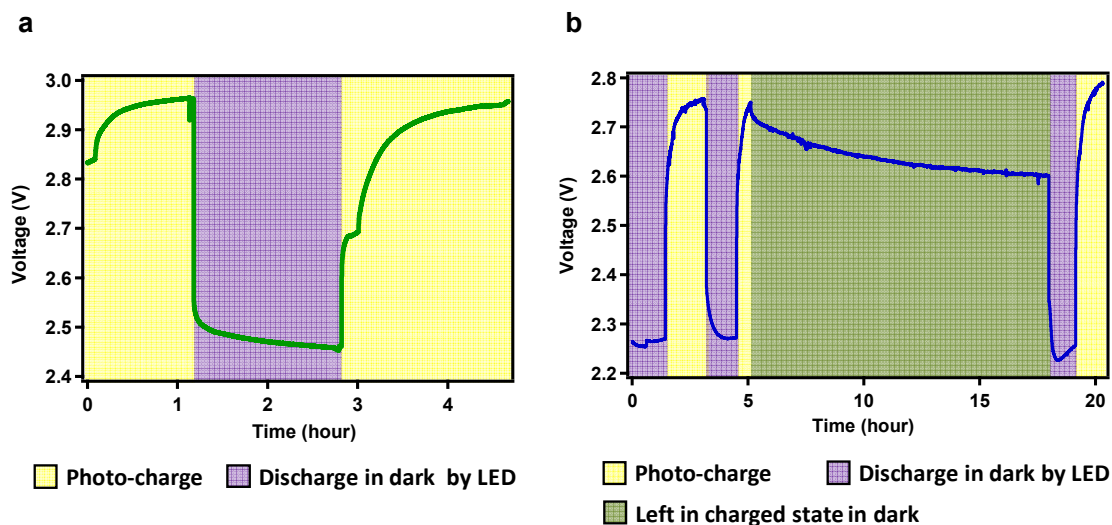

**Figure S7:** (a) Photocharge-discharge voltage curves of a perovskite photobattery electrodes (*B2*) when discharged by a white light LED in dark conditions. The LED has a turn-on voltage of about 2.2 V. This demonstrates that perovskite photobatteries are capable of powering an LED for more than an hour when fully photocharged. (b) Photocharge-discharge voltage curves of a perovskite photobattery electrodes (*B1*) showing the capacity retention of the photo-battery in charged state.



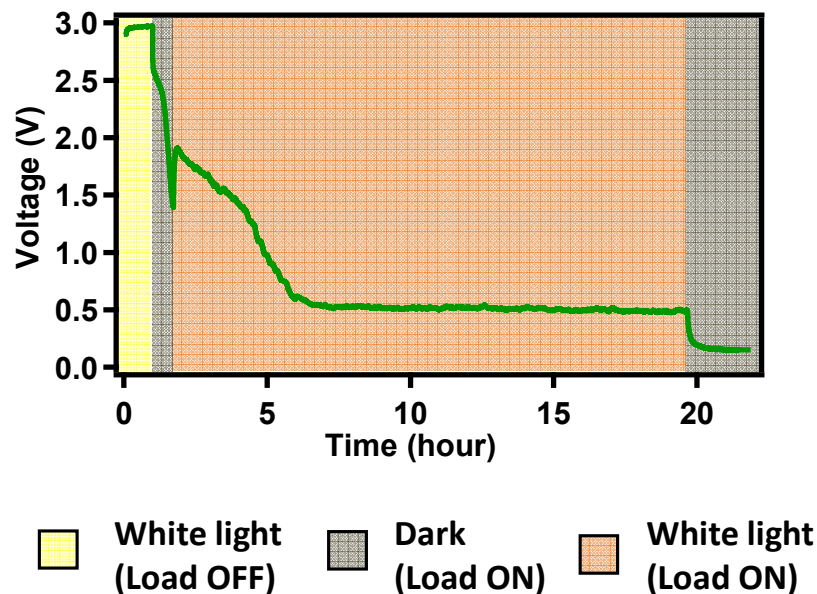

**Figure S8:** *In-situ* discharge potential from a device used for 5 cycles (shown in Fig 2C). Here, a fully photo-charged device was first discharged in dark conditions to 1.4 V (grey region), then the battery was illuminated, inducing photo-charging while discharging (red region). Since the device was already cycled previously, the performance was not as good as a new device (Fig 3A), but still, a stable potential value of  $\sim 0.5$  V ( $\eta \sim 0.011$  %) is achieved for more than 13 hours. When the light was finally turned OFF (grey region), the voltage dropped to  $\sim 0.15$  V (grey region).

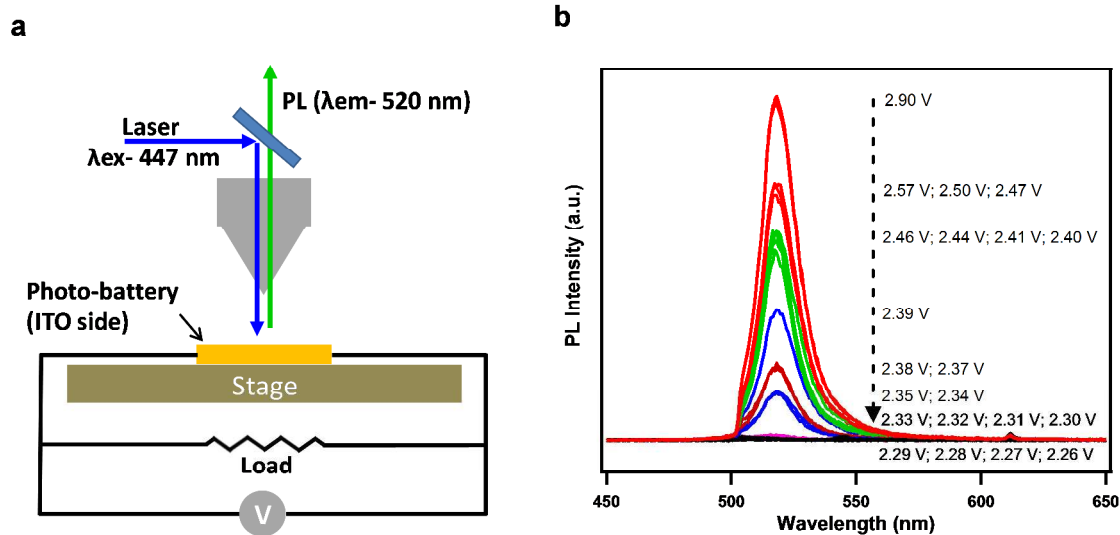

**Figure S9:** (a) Shows the confocal PL set-up designed to measure the in-situ PL of perovskite films (*B2*) while discharging them through a resistive load (21.5 k $\Omega$ ). (b) Exciton PL spectra collected against the corresponding values of the open circuit voltage (OCV) of the photo-battery.

## References:

- (1) Nie, W.; Tsai, H.; Asadpour, R.; Blancon, J.-C.; Neukirch, A. J.; Gupta, G.; Crochet, J. J.; Chhowalla, M.; Treiak, S.; Alam, M. A.; Wang, H. L.; Mohite, A. *D. Science* **2015**, *347*, 522-525.
- (2) Saikumar, I.; Ahmad, S.; Baumberg, J. J.; Vijaya Prakash, G. *Scr. Mater.* **2012**, *67*, 834-837.
- (3) Ahmad, S.; Prakash, G. V. *J. Nanophotonics* **2014**, *8*, 83892.
- (4) Zhuang, G. V.; Yang, H.; Blizanac, B.; Jr. Ross, P. N. *Electrochem. Solid-State Lett.* **2005**, *8*, A441-A445.
